# Supplementary material
Source: PubMed Central journal article supplement (PMC5528678)
Supplement: MOL2-9-179-s001.pdf [file MOL2-9-179-s001.pdf]

Supplemental Figure 1 Owens

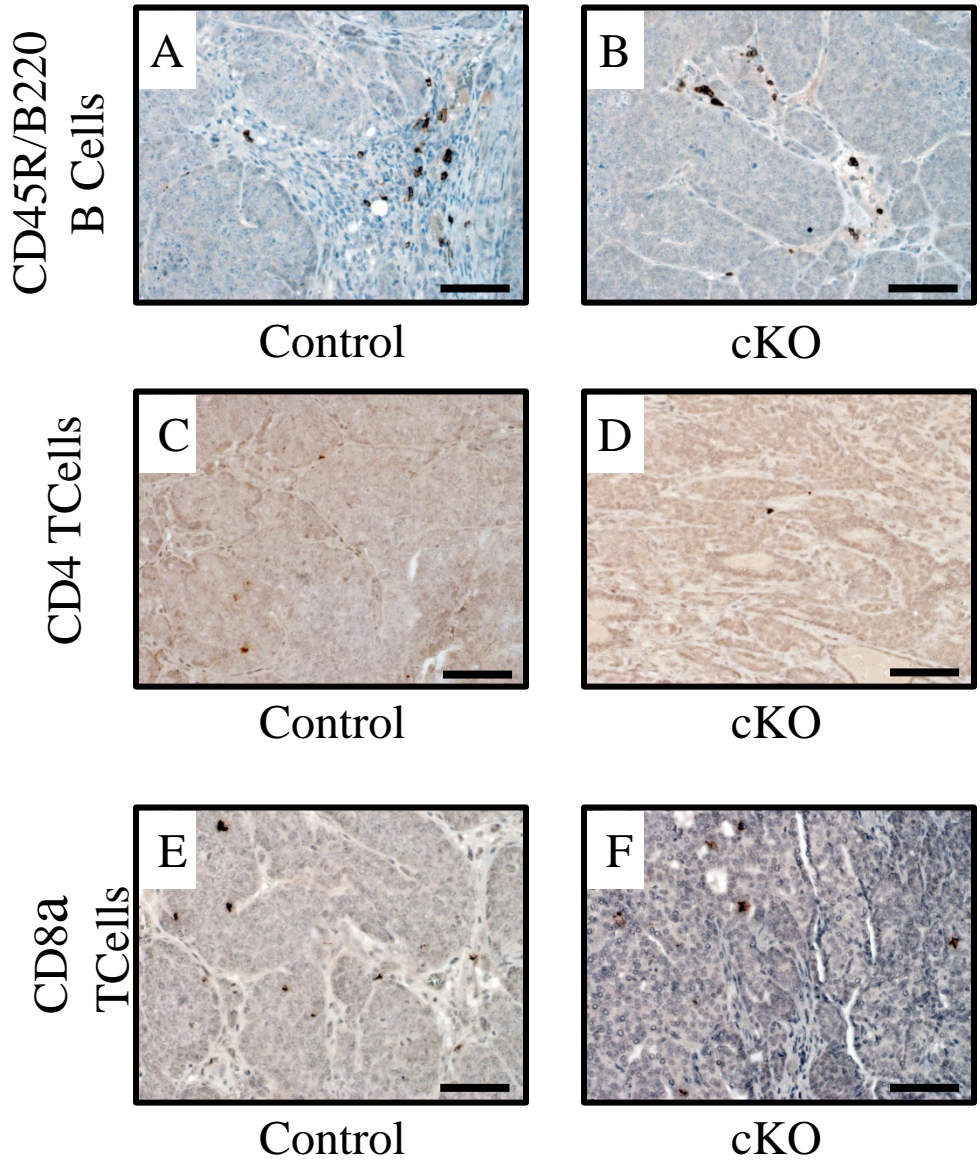

A

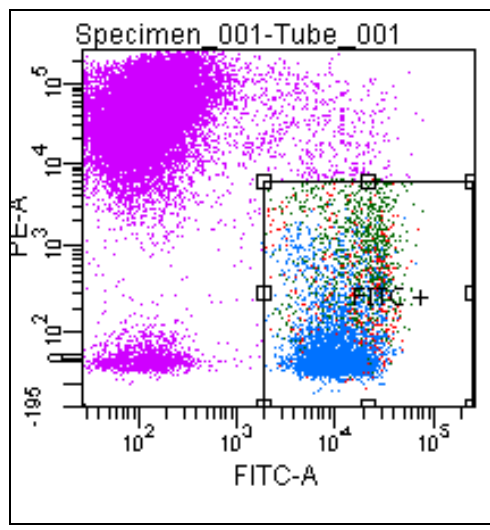

B

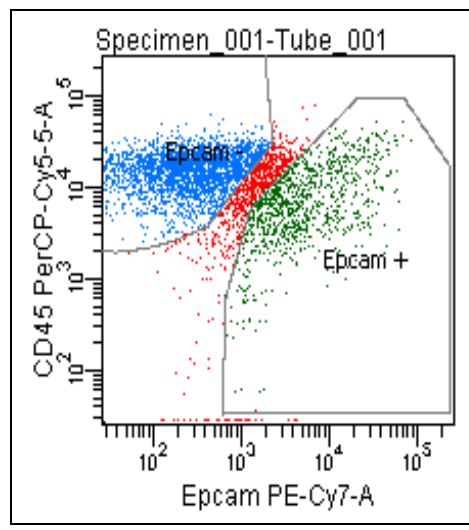

C

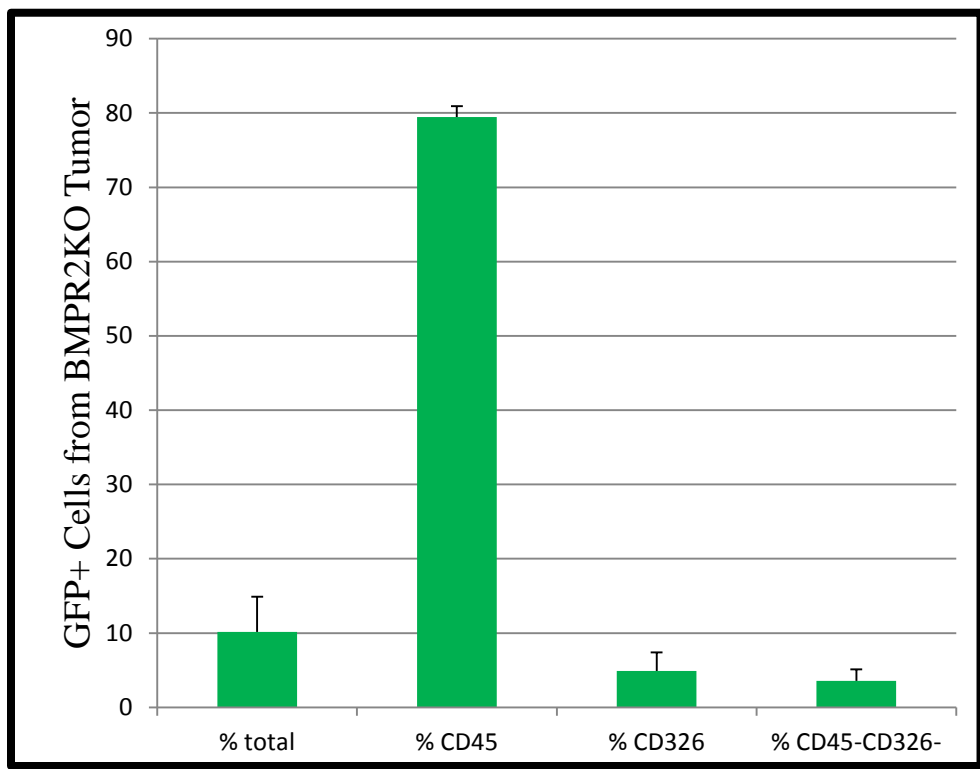

A PCR Genotyping of cell lines

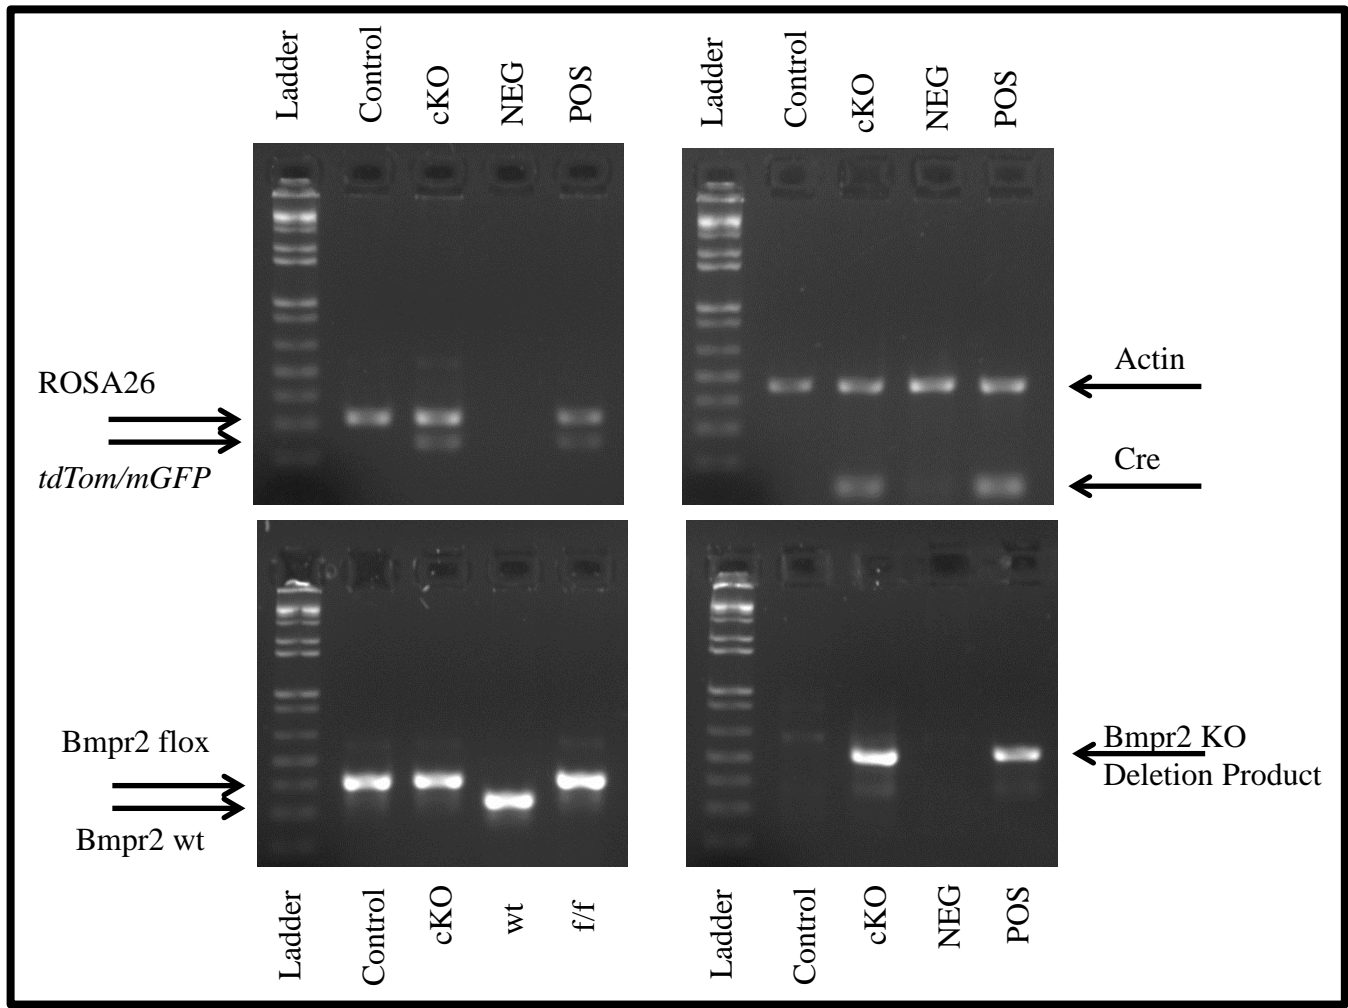

B Cell line qPCR characterization

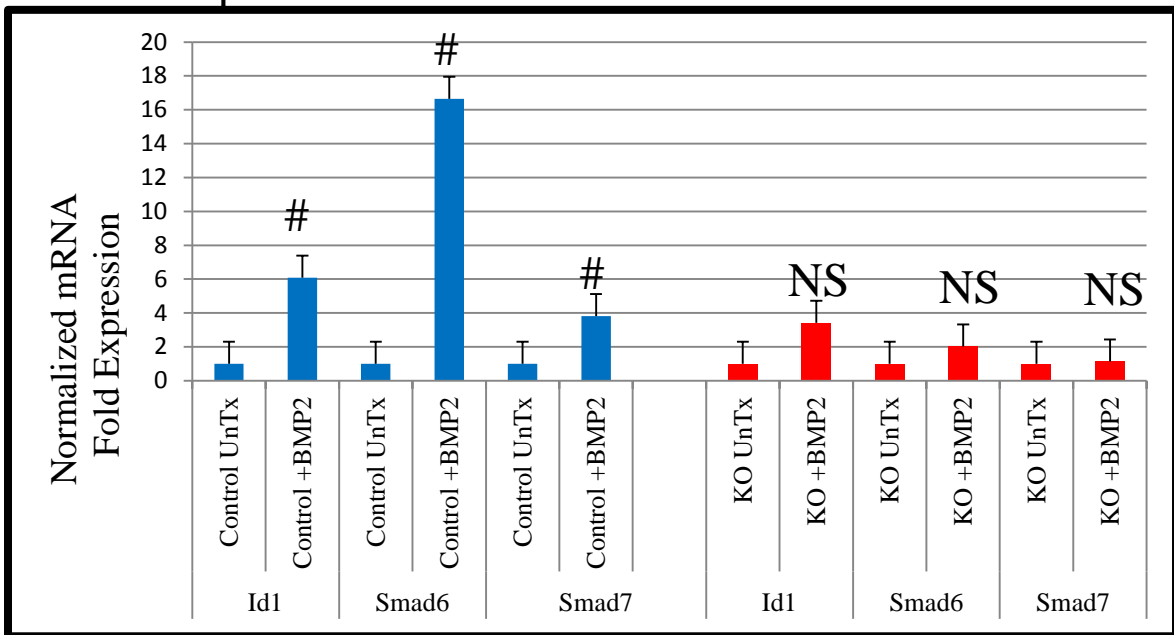

Supplemental Figure 4 Owens

A

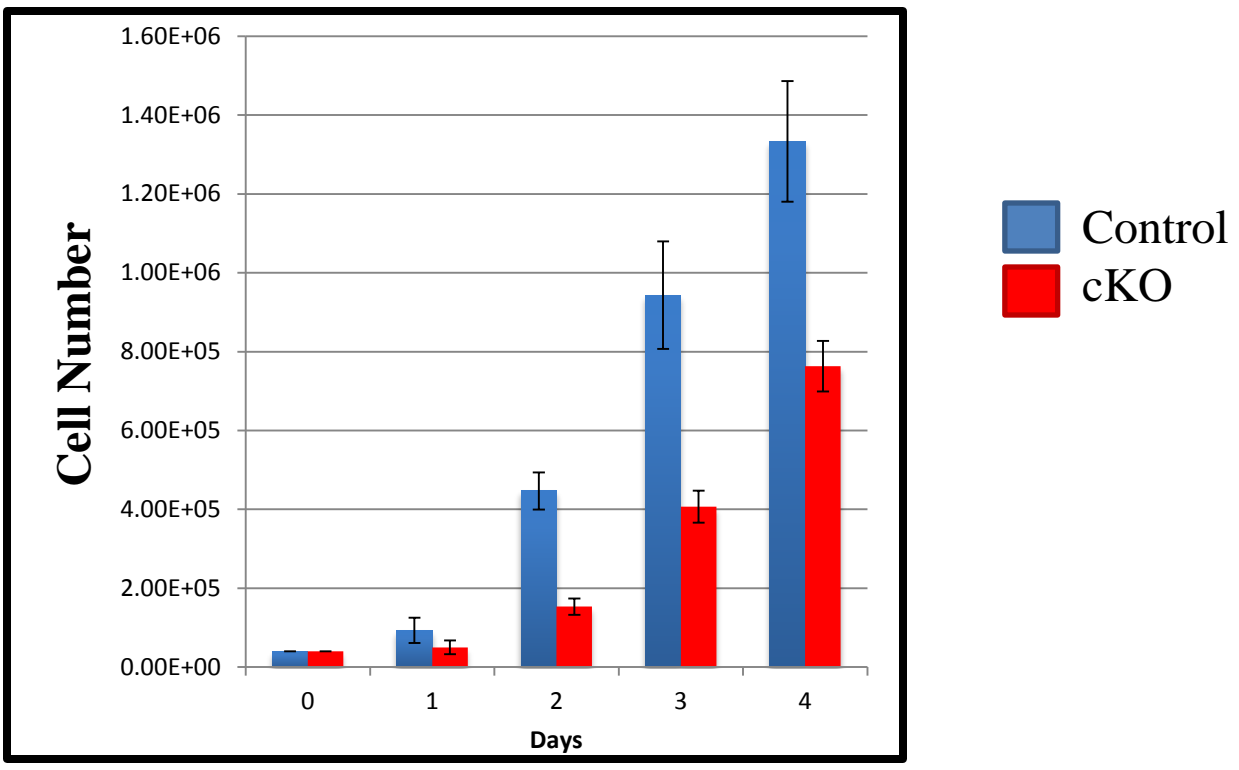

B

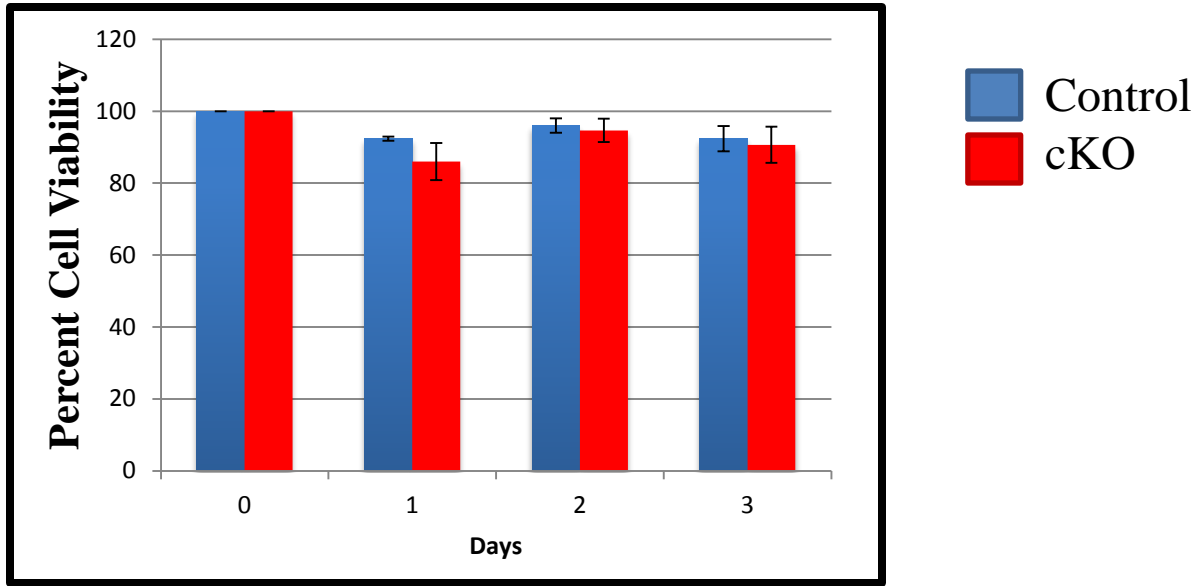

Supplemental Figure 5 Owens

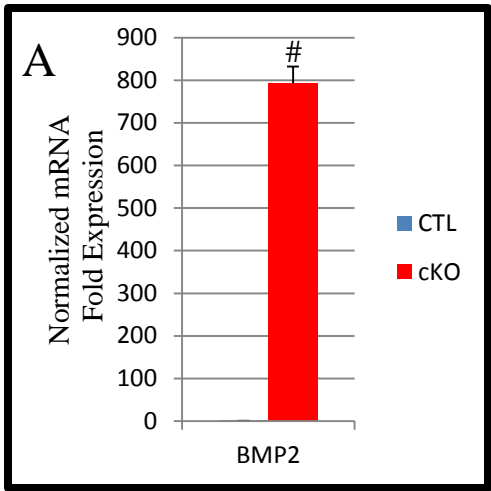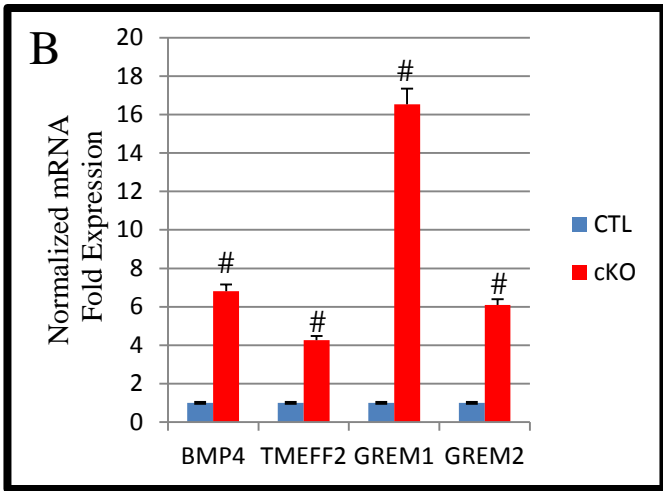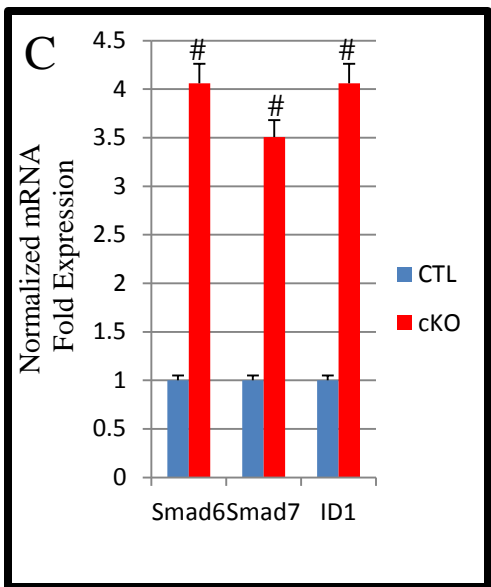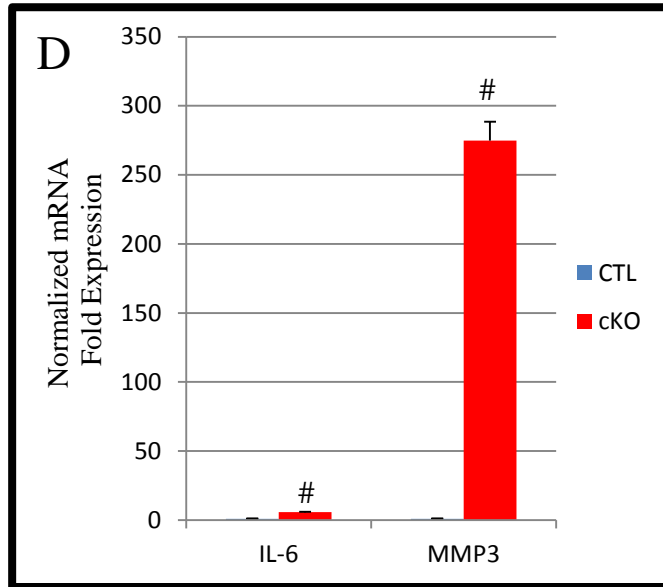

Supplemental Figure 6 Owens

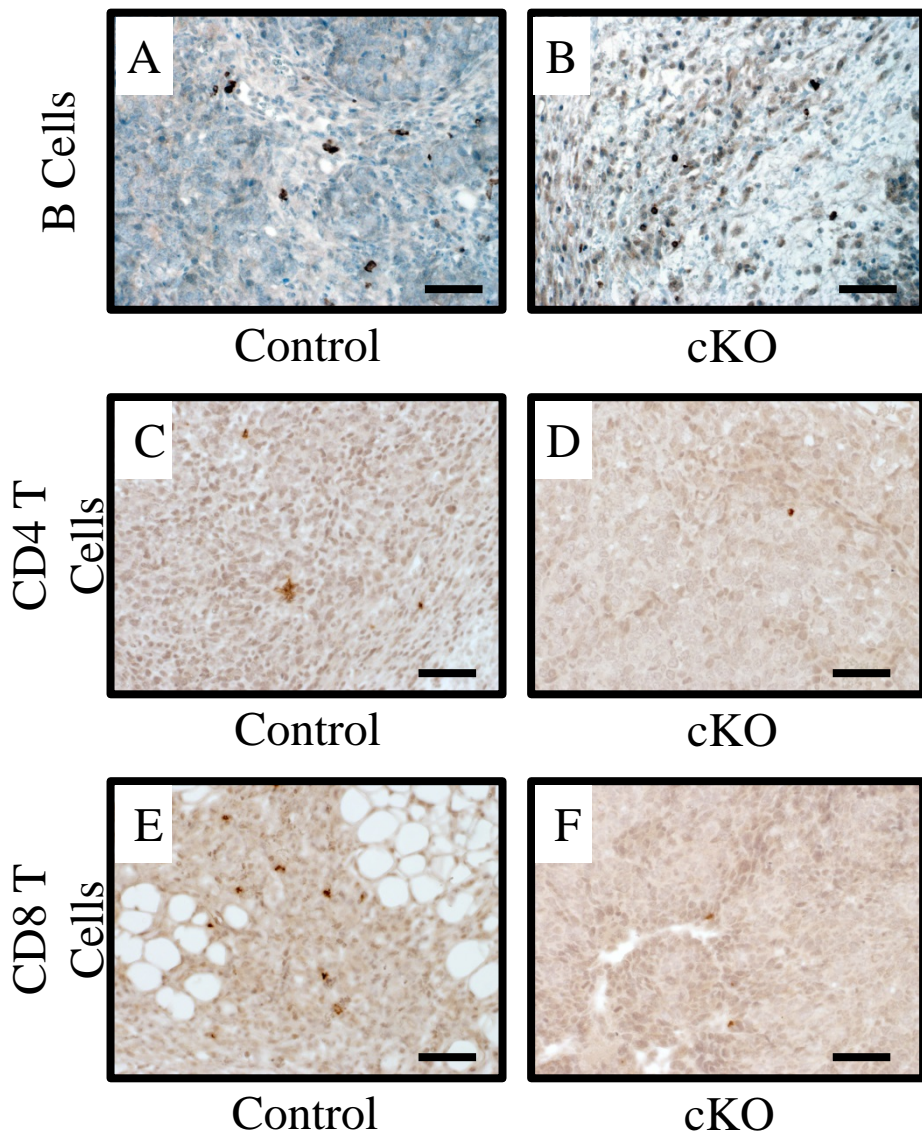

MECA-32

Spontaneous

Implants

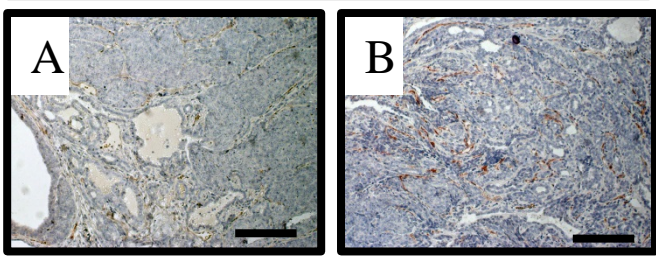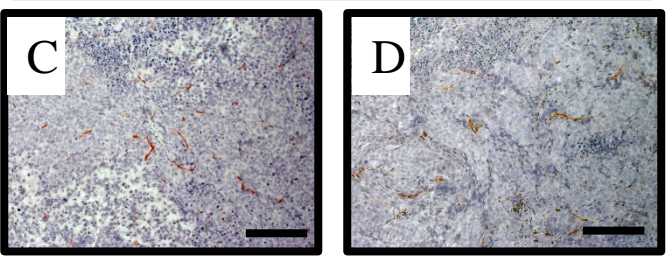

Control

cKO

Control

cKO

Spontaneous

Implants

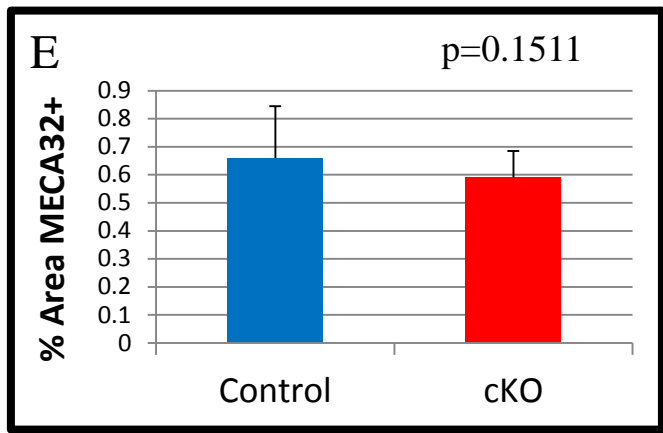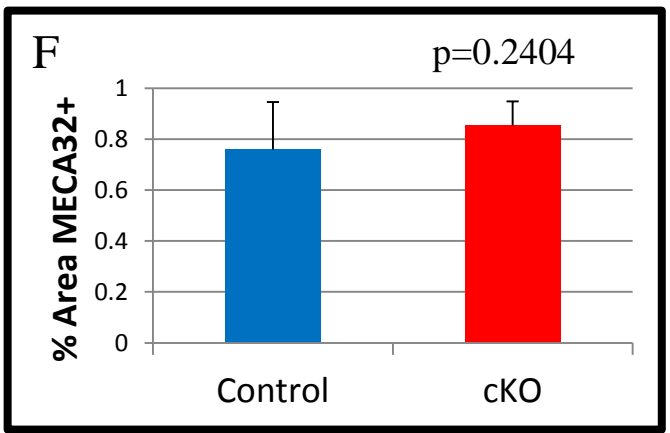

## Supplemental Table 1 Owens

| <u>Gene Symbol</u> | <u>Fold Regulation</u> | - | <u>Gene Symbol</u> | <u>Fold Regulation</u> |
|--------------------|------------------------|---|--------------------|------------------------|
| Tollip             | 427.565                |   | Apol7a             | -19.4271               |
| Prl                | 194.0117               |   | Il31ra             | -15.1369               |
| Il13ra2            | 190.019                |   | Il20ra             | -5.7757                |
| Gfra2              | 156.498                |   | Ephx2              | -5.5022                |
| Nos2               | 91.1392                |   | Ppbp               | -4.7568                |
| Gfra2              | 156.498                |   | Fpr1               | -4.3169                |
| Bmp2               | 86.8227                |   |                    |                        |
| Tnfsf9             | 81.0084                |   |                    |                        |
| Cxcl10             | 56.1028                |   |                    |                        |
| Il16               | 44.9422                |   |                    |                        |
| Gdf7               | 38.8542                |   |                    |                        |
| Ccl5               | 33.1285                |   |                    |                        |
| Tnfaip6            | 22.6274                |   |                    |                        |
| Tlr2               | 18.3792                |   |                    |                        |
| Lif                | 18.2522                |   |                    |                        |
| Cd40               | 14.5203                |   |                    |                        |
| Fgf10              | 16.1113                |   |                    |                        |
| Cxcl1              | 13.2691                |   |                    |                        |
| Ptgs2              | 11.0043                |   |                    |                        |
| Cxcl16             | 10.5561                |   |                    |                        |
| Cxcl5              | 9.9177                 |   |                    |                        |
| Cxcl9              | 9.0631                 |   |                    |                        |



## Supplemental Table 2 Owens

| <u>Gene</u>   | <u>Forward Primer Sequence</u> | <u>Reverse Primer Sequence</u> |
|---------------|--------------------------------|--------------------------------|
| <i>Gapdh</i>  | CACCCAGCAAGGACACTGAGCAAG       | GGGTCTGGGATGGAAATTGTGAGG       |
| <i>Id1</i>    | AGCTGTTCGCTGAAGGCGGG           | TGGCCACGCTTTGCTCCGAC           |
| <i>Smad6</i>  | TGGTCCCTCGCGGACTGAGG           | GCCTGTCGTCGAAGGGGCAC           |
| <i>Smad7</i>  | CTCCTCCGCGGAAACCGGG            | TGCCACCACGCACCAGTGTG           |
| <i>G-csf</i>  | ATGGCTCAACTTTCTGCCAG           | CTGACAGTGACCAGGGGAAC           |
| <i>Ccl5</i>   | GCTGCTTTGCCTACCTCTCC           | TCGAGTGACAAACACGACTGC          |
| <i>Bmp2</i>   | GGGACCCGCTGTCTTCTAGT           | TCAACTCAAATTCGCTGAGGAC         |
| <i>Bmp4</i>   | TTCCTGGTAACCGAATGCTGA          | CCTGAATCTCGGCGACTTTTT          |
| <i>Tmeff2</i> | CTGGCGAGACCAGTCAGAAG           | ATGTTGCACACACACCAGACA          |
| <i>Grem1</i>  | AAGCGAGATTGGTGCAAACT           | GAAGCGGTTGATGATAGTGCG          |
| <i>Grem2</i>  | TGTGCTGGTAAAGGTAGCTGA          | CCACCTCTCTGAGTTGTTGCT          |
| <i>Il6</i>    | TAGTCCTTCCTACCCCAATTTCC        | TTGGTCCTTAGCCACTCCTTC          |
| <i>Mmp3</i>   | GGCCTGGAACAGTCTTGGC            | TGTCCATCGTTCATCATCGTCA         |
